# Supplementary material for: Phenotypical changes and clinical significance of CD4+/CD8+ T cells in SLE
Source: PubMed Central journal article supplement — Lupus Sci Med. 2022 Jun 22;9(1):e000660. doi: 10.1136/lupus-2022-000660 (PMC9226979; doi:10.1136/lupus-2022-000660), 2022-06-22
Supplement: lupus-2022-000660supp001.pdf [file lupus-2022-000660supp001.pdf]

**Supplementary Table****Supplementary Table 1. The list of all monoclonal antibodies**

| <b>Panel</b>   | <b>Marker</b> | <b>Fluorochrome</b> | <b>Catalogue No.</b> | <b>Specification</b> |
|----------------|---------------|---------------------|----------------------|----------------------|
| <b>Panel 1</b> | CD3           | PerCP-Cy5.5         | 560835               | 50T                  |
|                | CD4           | APC-H7              | 560158               | 100T                 |
|                | CD8           | BV510               | 563919               | 100T                 |
|                | CD127         | BV421               | 562436               | 100T                 |
|                | CD25          | PE                  | 555432               | 100T                 |
|                | CD45RA        | FITC                | 555488               | 100T                 |
|                | CCR7          | AF647               | 557734               | 100T                 |
|                | CD28          | PE-Cy7              | 560684               | 50T                  |
| <b>Panel 2</b> | CD3           | PerCP-Cy5.5         | 560835               | 50T                  |
|                | CD8           | FITC                | 555634               | 100T                 |
|                | CD28          | PE-Cy7              | 560684               | 50T                  |
|                | CD57          | BV421               | 563896               | 50T                  |
|                | CD38          | BV510               | 563251               | 50T                  |
|                | HLA-DR        | PE                  | 555812               | 100T                 |
|                | CD279(PD1)    | AF647               | 560838               | 100T                 |
| <b>Panel 3</b> | CD3           | APC-H7              | 560176               | 100T                 |
|                | CD4           | PE-Cy7              | 557852               | 100T                 |
|                | CD8           | PerCP-Cy5.5         | 565310               | 100T                 |
|                | CD183(CXCR3)  | AF488               | 558047               | 100T                 |
|                | CD196 (CCR6)  | BV510               | 563241               | 50T                  |
|                | CD185(CXCR5)  | AF647               | 558113               | 100 T                |
|                | CD194(CCR4)   | BV421               | 562579               | 50 T                 |
|                | CD279(PD1)    | PE                  | 557946               | 100T                 |

**Supplementary Table 2. The 37 T lymphocyte subsets**

| T Lymphocyte subsets                                                 | Phenotype                                                                                                   |
|----------------------------------------------------------------------|-------------------------------------------------------------------------------------------------------------|
| T cell                                                               | CD3 <sup>+</sup>                                                                                            |
| CD4 <sup>+</sup> T cell (Th cell)                                    | CD3 <sup>+</sup> CD4 <sup>+</sup>                                                                           |
| CD8 <sup>+</sup> T cell (Tc cell)                                    | CD3 <sup>+</sup> CD8 <sup>+</sup>                                                                           |
| Double-positive T cell                                               | CD3 <sup>+</sup> CD4 <sup>+</sup> CD8 <sup>+</sup>                                                          |
| Naïve CD4 <sup>+</sup> T cell                                        | CD3 <sup>+</sup> CD4 <sup>+</sup> CD45RA <sup>+</sup> CCR7 <sup>+</sup>                                     |
| Terminally Differentiated CD4 <sup>+</sup> T cell                    | CD3 <sup>+</sup> CD4 <sup>+</sup> CD45RA <sup>+</sup> CCR7 <sup>-</sup>                                     |
| Central Memory CD4 <sup>+</sup> T cell                               | CD3 <sup>+</sup> CD4 <sup>+</sup> CD45RA <sup>-</sup> CCR7 <sup>+</sup>                                     |
| Effector Memory CD4 <sup>+</sup> T cell                              | CD3 <sup>+</sup> CD4 <sup>+</sup> CD45RA <sup>-</sup> CCR7 <sup>-</sup>                                     |
| CD4 <sup>+</sup> CD28 <sup>-</sup> T cell                            | CD3 <sup>+</sup> CD4 <sup>+</sup> CD28 <sup>-</sup>                                                         |
| CD4 <sup>+</sup> CD28 <sup>+</sup> T cell                            | CD3 <sup>+</sup> CD4 <sup>+</sup> CD28 <sup>+</sup>                                                         |
| Regulatory T cell                                                    | CD3 <sup>+</sup> CD4 <sup>+</sup> CD25 <sup>+</sup> CD127 <sup>low/-</sup>                                  |
| Naïve CD8 <sup>+</sup> T cell                                        | CD3 <sup>+</sup> CD8 <sup>+</sup> CCR7 <sup>+</sup> CD45RA <sup>+</sup>                                     |
| Terminally Differentiated CD8 <sup>+</sup> T cell                    | CD3 <sup>+</sup> CD8 <sup>+</sup> CCR7 <sup>-</sup> CD45RA <sup>+</sup>                                     |
| Central Memory CD8 <sup>+</sup> T cell                               | CD3 <sup>+</sup> CD8 <sup>+</sup> CCR7 <sup>+</sup> CD45RA <sup>-</sup>                                     |
| Effector Memory CD8 <sup>+</sup> T cell                              | CD3 <sup>+</sup> CD8 <sup>+</sup> CCR7 <sup>-</sup> CD45RA <sup>-</sup>                                     |
| CD127 <sup>+</sup> effector memory CD8 <sup>+</sup> T cell           | CD3 <sup>+</sup> CD8 <sup>+</sup> CCR7 <sup>-</sup> CD45RA <sup>-</sup> CD127 <sup>+</sup>                  |
| CD127 <sup>-</sup> effector memory CD8 <sup>+</sup> T cell           | CD3 <sup>+</sup> CD8 <sup>+</sup> CCR7 <sup>-</sup> CD45RA <sup>-</sup> CD127 <sup>-</sup>                  |
| CD127 <sup>+</sup> terminally differentiated CD8 <sup>+</sup> T cell | CD3 <sup>+</sup> CD8 <sup>+</sup> CCR7 <sup>-</sup> CD45RA <sup>+</sup> CD127 <sup>+</sup>                  |
| CD127 <sup>-</sup> terminally differentiated CD8 <sup>+</sup> T cell | CD3 <sup>+</sup> CD8 <sup>+</sup> CCR7 <sup>-</sup> CD45RA <sup>+</sup> CD127 <sup>-</sup>                  |
| CD8 <sup>+</sup> PD1 <sup>+</sup> T cell                             | CD3 <sup>+</sup> CD8 <sup>+</sup> PD1 <sup>+</sup>                                                          |
| CD8 <sup>+</sup> CD28 <sup>-</sup> T cell                            | CD3 <sup>+</sup> CD8 <sup>+</sup> CD28 <sup>-</sup>                                                         |
| CD8 <sup>+</sup> CD28 <sup>+</sup> T cell                            | CD3 <sup>+</sup> CD8 <sup>+</sup> CD28 <sup>+</sup>                                                         |
| CD8 <sup>+</sup> HLADR <sup>+</sup> T cell                           | CD3 <sup>+</sup> CD8 <sup>+</sup> HLADR <sup>+</sup>                                                        |
| CD8 <sup>+</sup> HLADR <sup>+</sup> CD38 <sup>+</sup> T cell         | CD3 <sup>+</sup> CD8 <sup>+</sup> HLADR <sup>+</sup> CD38 <sup>+</sup>                                      |
| CD8 <sup>+</sup> CD28 <sup>-</sup> CD57 <sup>+</sup> T cell          | CD3 <sup>+</sup> CD8 <sup>+</sup> CD28 <sup>-</sup> CD57 <sup>+</sup>                                       |
| Th1 cell                                                             | CD3 <sup>+</sup> CD4 <sup>+</sup> CXCR5 <sup>-</sup> CXCR3 <sup>+</sup> CCR4 <sup>-</sup>                   |
| Th2 cell                                                             | CD3 <sup>+</sup> CD4 <sup>+</sup> CXCR5 <sup>-</sup> CXCR3 <sup>-</sup> CCR4 <sup>+</sup>                   |
| Th17 cell                                                            | CD3 <sup>+</sup> CD4 <sup>+</sup> CXCR5 <sup>-</sup> CXCR3 <sup>-</sup> CCR4 <sup>-</sup> CCR6 <sup>+</sup> |
| Tfh cell                                                             | CD3 <sup>+</sup> CD4 <sup>+</sup> CXCR5 <sup>+</sup>                                                        |
| Tfh1 cell                                                            | CD3 <sup>+</sup> CD4 <sup>+</sup> CXCR5 <sup>+</sup> CXCR3 <sup>+</sup> CCR4 <sup>-</sup>                   |
| Tfh2 cell                                                            | CD3 <sup>+</sup> CD4 <sup>+</sup> CXCR5 <sup>+</sup> CXCR3 <sup>-</sup> CCR4 <sup>+</sup>                   |
| Tfh17 cell                                                           | CD3 <sup>+</sup> CD4 <sup>+</sup> CXCR5 <sup>+</sup> CXCR3 <sup>-</sup> CCR4 <sup>-</sup> CCR6 <sup>+</sup> |
| Tc1 cell                                                             | CD3 <sup>+</sup> CD8 <sup>+</sup> CXCR5 <sup>-</sup> CXCR3 <sup>+</sup> CCR4 <sup>-</sup>                   |
| Tc2 cell                                                             | CD3 <sup>+</sup> CD8 <sup>+</sup> CXCR5 <sup>-</sup> CXCR3 <sup>-</sup> CCR4 <sup>+</sup>                   |
| Tc17 cell                                                            | CD3 <sup>+</sup> CD8 <sup>+</sup> CXCR5 <sup>-</sup> CXCR3 <sup>-</sup> CCR4 <sup>-</sup> CCR6 <sup>+</sup> |
| CD4 <sup>+</sup> CXCR5 <sup>-</sup> PD1 <sup>+</sup> T cell          | CD3 <sup>+</sup> CD4 <sup>+</sup> CXCR5 <sup>-</sup> PD1 <sup>+</sup>                                       |
| CD4 <sup>+</sup> CXCR5 <sup>+</sup> PD1 <sup>+</sup> T cell          | CD3 <sup>+</sup> CD4 <sup>+</sup> CXCR5 <sup>+</sup> PD1 <sup>+</sup>                                       |

Th cell: Helper T cell, Tc cell: Cytotoxic T lymphocyte, Tfh cell: Follicular helper T cell.

## Supplementary Figure

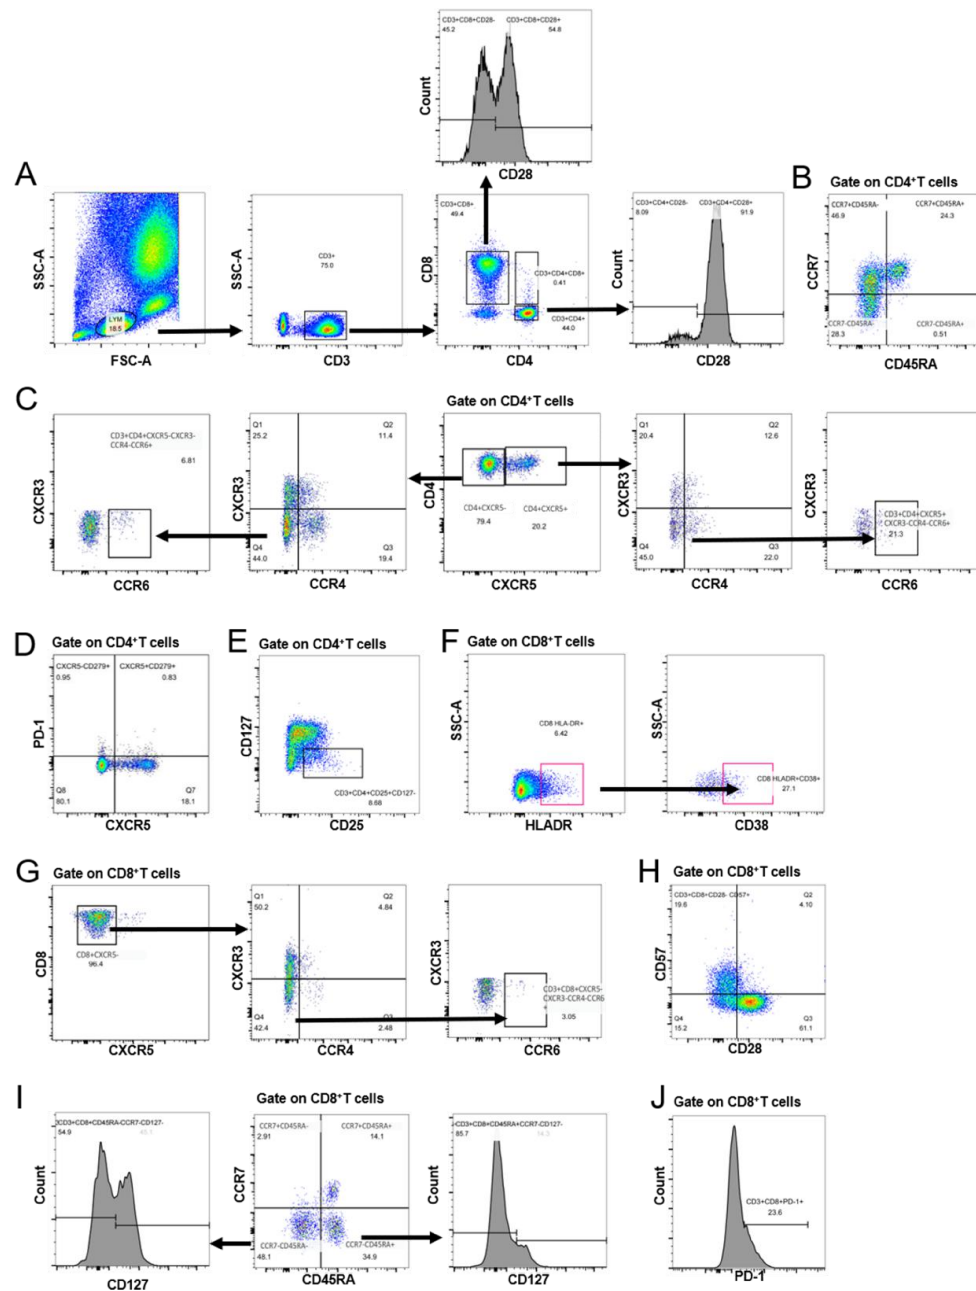

**Supplementary Figure 1. Gating strategy for flow cytometric analysis:** (A) Gating of CD4<sup>+</sup> T cells, CD8<sup>+</sup> T cells, and their subsets based on the expression of CD28. (B) CD4<sup>+</sup> T cell subsets based on the expression of CCR7 and CD45RA. (C) Gating of Th and Tfh subsets. (D) Gating of Tph and activated Tfh cells. (E) Gating of CD4<sup>+</sup> Treg. (F) Gating HLADR, and CD38 in CD8<sup>+</sup> T cells. (G) Gating of Tc1, Tc2, and Tc17 subsets. (H) CD8<sup>+</sup> T cell subsets

based on the expression of CD28 and CD57. (I) Gating of CD8<sup>+</sup> T cell subsets based on the expression of CCR7, CD45RA, and CD127. (J) Gating of PD1 in CD8<sup>+</sup> T cells.

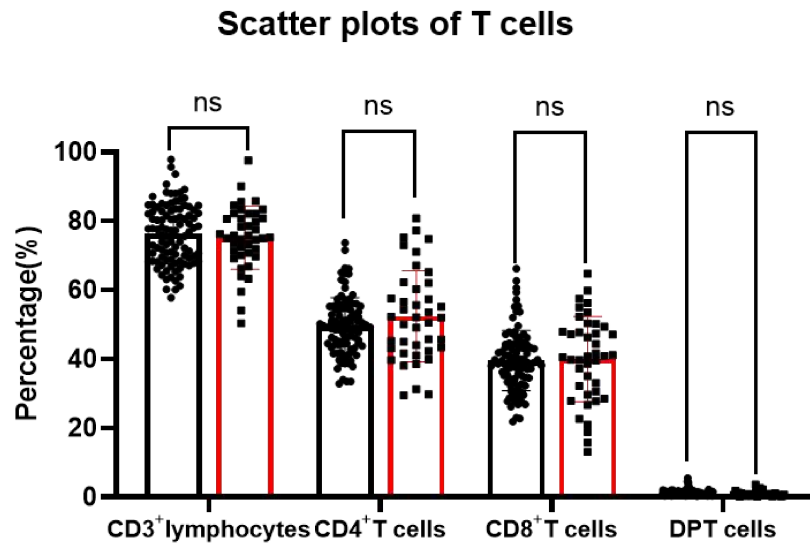

**Supplementary Figure 2.** Proportions of T cells, including CD4<sup>+</sup> T cells, CD8<sup>+</sup> T cells, and double-positive T cells, between SLE patients and HCs.

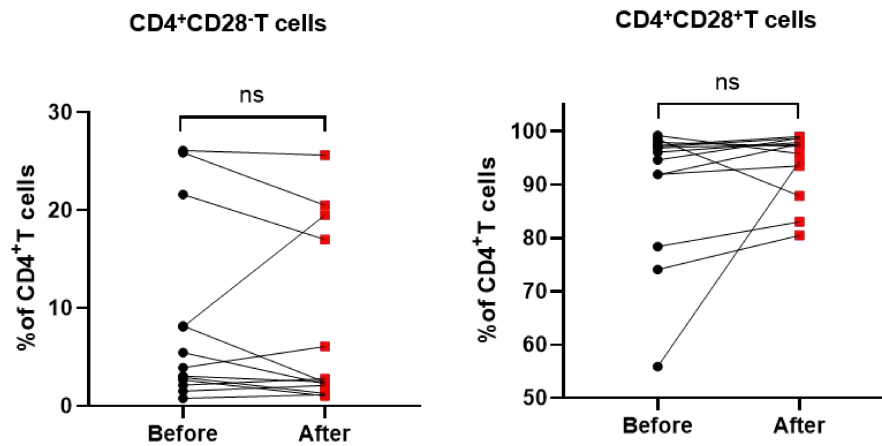

**Supplementary Figure 3.** Changes in the frequencies of CD4<sup>+</sup>CD28<sup>-</sup> T cells and CD4<sup>+</sup>CD28<sup>+</sup> T cells from 13 active SLE patients before (baseline) and after lupus treatment.

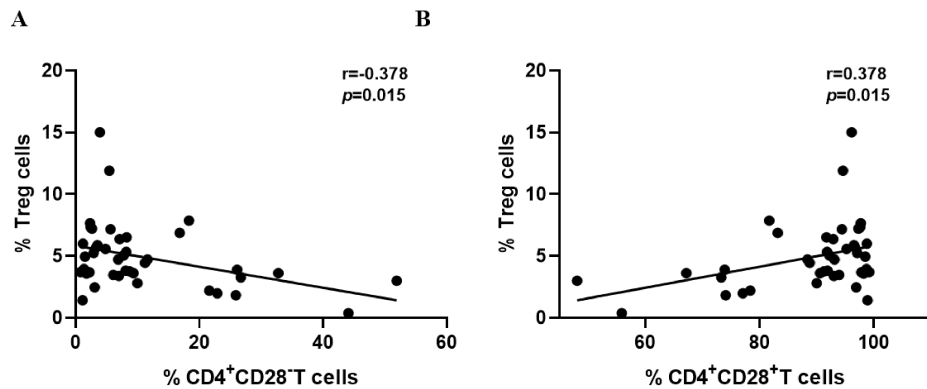

**Supplementary Figure 4.** (A) Correlation between the frequency of CD4<sup>+</sup>CD28<sup>-</sup> T cells and Treg cells in SLE patients. (B) Correlation between the frequency of CD4<sup>+</sup>CD28<sup>+</sup> T cells and Treg cells in SLE patients.

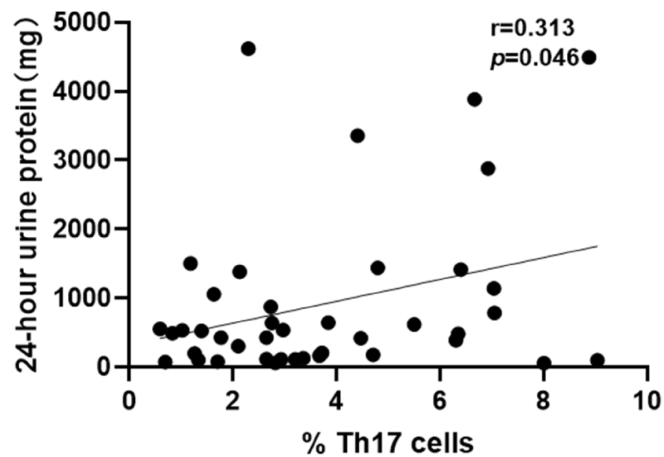

**Supplementary Figure 5.** Correlation between the frequency of Th17 cells and the level of 24-h urinary protein in SLE patients.
