# Supplementary material for: Phenotypical changes and clinical significance of CD4+/CD8+ T cells in SLE
Source: HighWire-hosted journal article supplement (doi:10.1136/lupus-2022-000660), 2022-06-01
Supplement: lupus-2022-000660supp002_data_supplement.xlsx [file lupus-2022-000660supp002_data_supplement.xlsx]

## Sheet: SLE
number	gender	age	SLEDAI-2k	LN	24h-upro	C3	ANA	anti ds-DNA	T cell	CD4+T cell	CD8+T cell	Double-positive T cell	Th/Tc	Naive CD4+T cell	Terminally differentiated CD4+T cell	Central memory CD4+T cell	Effector memory CD4+T cell	CD28-CD4+T cell	CD28+CD4+T cell	Regulatory T cell	Naive CD8+T cell	Terminally differentiated CD8+T cell	Central memory CD8+T cell	Effector memory CD8+T cell	CD28-CD8+T cell	CD127+ effector memory CD8+T cell	CD127- effector memory CD8+T cell	CD127+ terminally differentiated CD8+T cell	CD127-terminally differentiated CD8+T cell	Tfh	Th1	Th2	Th17	Tfh1	Tfh2	Tfh17	Tc1	Tc2	Tc17	Th1/Th2	Th17/Th2	(Th1+Th17)/Th2	CXCR5-PD1+CD4+T cell	CXCR5+PD1+CD4+T cell	PD1+CD8+T cell	CD28+CD8+T cell	HLADR+CD8+T cell	HLADR＋CD38+CD8+T cell	CD28-CD57+CD8+T cell
1	1	19	14	1	3355	0.553	435.3	315.4	74.5	49.1	47.1	0.18	1.04246	29.7	6.6	43.5	27.9	5.45	94.6	1.9	11.54	83.6	4.01	14.69	36.2	48.5	44.5	64	36	17.7	9.42	21.7	4.41	12	26.3	19.6	30.5	0.65	3.88	0.434101	0.203226	0.637327	86.3	14	4.72	50.3	2.06	69.3	2.5
2	1	40	14	1	4495	0.123	526.2	534.9	82.1	41.6	46.3	0.71	0.898488	15.9	8.71	71.4	21.68	9.36	90.6	3.63	14.8	63.3	3.53	32.2	29.1	29.6	20.2	82.9	17.1	21.9	0.91	21.9	8.88	0.56	20.9	7.64	1.82	1.89	1.01	0.0415525	0.405479	0.447032	83	16.5	17.7	73	7.73	97.2	5.63
3	0	36	10	1	205	0.405	558.4	602.4	72.6	43.4	50.4	2.12	0.861111	21.9	5.91	47.8	42.1	6.88	93.1	1.73	14.7	67.3	4.78	27.1	73.1	31	7.69	31.5	18.5	33.3	17.4	20.2	3.72	18.5	24.9	11.2	36.6	2.2	0.26	0.861386	0.184158	1.04554	84.9	17.9	10.1	42.9	15.9	88.9	11.9
4	1	16	8	1	429	0.803	416.7	324.5	84.5	38.1	57.5	1.32	0.662609	19.1	7.75	60.2	30.6	7.13	92.9	2.38	14.5	26.4	4.29	68.7	32.7	33.7	19	38.8	21.2	26.6	6.56	27.9	2.65	5.41	34.3	3.41	14.9	2.99	3.34	0.235125	0.0949821	0.330108	74.1	15.3	34.9	62	14.8	94	17.5
5	1	27	10	0	116	0.438	477.1	344.9	78.5	45.3	47.2	0.52	0.959746	33.8	6.01	40	37.9	2.66	97.3	2.22	14.7	64.4	4.41	30.3	19.5	25.4	87.1	8.81	12.9	20.1	20.6	10.9	2.65	27.2	9.46	13.4	44.8	1.23	1.26	1.88991	0.243119	2.13303	87	15.2	7.14	84	8.2	82.8	6.04
6	1	30	10	1	419	0.355	466	451.7	75	44	49.4	0.41	0.890688	14	7.49	62.6	33.6	8.09	91.9	3.82	48.8	40.1	4.01	20.9	49	51.6	60.9	14.3	39.1	21.6	37.5	16.8	4.47	30.8	21.8	7.28	56.5	1.71	2.86	2.23214	0.266071	2.49821	82.1	18.2	23.6	63.3	1.17	82.1	19.7
7	0	61	10	1	525	0.895	417.3	333.1	75.8	65.2	27.8	1.11	2.34532	46.4	4.39	18.7	48.3	2.79	99.2	3.71	35.4	16.7	9.79	51.9	40.1	84.2	28.3	29.6	71.7	16.6	23.6	7.78	1.39	25.4	20.5	17.3	57.3	0.9	3.66	3.03342	0.178663	3.21208	93.5	15	21.1	59.9	4.18	25.3	30.6
8	1	29	8	1	871	0.158	411	321.4	66.9	39.9	52.3	0.87	0.762906	25.6	4.92	56.1	31.1	8.2	91.8	5.34	28.4	41.6	3.53	40.3	47.9	23.5	89	8.31	11	20.3	16.7	19.3	2.73	25.2	21.1	7.19	25.8	0.29	1.39	0.865285	0.141451	1.00674	74.7	17.6	25.3	52.1	13.1	91.9	25.6
9	1	51	8	1	618	0.503	451.3	298.9	66.2	60.3	33	1.77	1.82727	23.2	5.64	54.4	34.4	21.6	78.4	2.2	25	30.5	6.21	52.1	50.4	36.5	76	12.4	24	13.7	5.21	7.99	5.5	13.7	21.9	15.7	13.3	1.67	3.36	0.652065	0.68836	1.34043	79.8	10.6	18	49.1	10.6	75.5	20.8
10	0	22	10	0	111	0.9	108.2	59.8	69.2	50.5	40.5	2.18	1.24691	8.65	6.46	54	48.6	25.9	74.1	1.84	27.3	40.5	4.95	41	38.3	61.6	50.9	6.78	49.1	13.7	48.1	8.91	2.93	42.5	16.9	9.22	56.7	0.61	3.12	5.39843	0.328844	5.72727	81.1	10.6	7.98	60.6	7.81	8.71	20.2
11	1	29	18	1	1058	0.506	530	762.9	80.7	75.3	21	0.54	3.58571	38.2	4.91	33.4	41.1	3.9	96.1	1.84		62.8	5.57	30.3	40.3	84.8	17.7	84.1	82.3	30.5	10.9	11.1	1.63	19.5	25	10.1	54.1	0.65	1.22	0.981982	0.146847	1.12883	70.3	18.4	9.68	60	12.4	84.1	15.9
12	1	54	11	1	638	0.193	517.2	611.1	75.3	71.1	26.7	0.4	2.66292	56.6	8	30	23.06	3.07	96.9	2.48	29.3	59.8	4.07	20.7	33.5	75.4	37.1	75.4	62.9	25.5	11.3	7.37	2.75	33.6	10.4	14.9	68.5	0.1	1.034	1.53324	0.373134	1.90638	69.4	12.8	12.7	64.7	2.72	81.9	19.9
13	0	23	14	1	4620	0.24	556	632.9	90.1	38.5	56.3	2.65	0.683837	54.9	5.5	28.2	29.1	1.52	98.5	4.96	7.71	72.9	5.72	27.4	22.3	95.3	7.18	92.8	92.8	11	9.65	15	2.3	20.4	28.7	11.4	25.9	3.07	1.1	0.643333	0.153333	0.796667	77.5	9.18	11.1	77.7	3.36	88.7	4.7
14	1	29	14	1	3886	0.335	328.9	211	64	41	47.9	0.89	0.85595	25	5.08	46	41.6	1.76	98.2	3.59	33.8	18.2	10.08	51.7	38.6	40.5	72	19.6	28	19	18.5	18.4	6.67	29.6	20.6	14.5	35.7	5.94	2.82	1.00543	0.3625	1.36793	69.6	17.3	18	61.4	2.64	72.8	16.7
15	1	32	14	1	177	0.633	310.9	160.5	71.4	39.7	55	0.67	0.721818	46.7	7.02	30	34	9.98	90	2.81	57.8	38.3	4.03	13.61	47.3	76.1	36.4	13.1	63.6	37.72	22.1	11.5	4.71	34	17	22	37.4	1.1	2.33	1.92174	0.409565	2.3313	90	7.87	20.8	52.7	1.49	50.5	30.1
16	0	37	8	1	490	0.594	309.5	155.6	59.5	73	22.7	3.62	3.21586	46.3	4.5	29.9	28	26.7	73.3	3.28	18.5	21.8	4.4	69	71.5	88.4	14.1	88.4	85.9	11.9	2.36	15.5	0.83	5.41	48.7	8.91	12.2	11.2	0.52	0.152258	0.0535484	0.205806	70	11.8	32.7	28.5	11.5	96	50.7
17	1	47	8	0	643	0.722	282.7	97	82.1	31.3	64.8	0.38	0.483025	14.9	6.43	59.1	37.3	5.64	94.4	1.17	52.4	16.3	3.44	41.6	58.2	21.99	90.5	5.58	99.49	23.7	16.8	33.4	3.84	9.74	47.5	4.03	24	6.24	2.21	0.502994	0.11497	0.617964	74.1	24.2	20.2	41.8	2.06	92.5	39.8
18	1	53	9	1	1141	0.673	500	422.4	54.1	67.1	30.6	0.85	2.19281	20.5	6.7	34.9	55.7	8.73	91.3	3.77	43	32.98	5.02	62.8	62.2	94.8	7.74	93	92.3	22.9	9.72	31.7	7.04	5.73	52.9	20	14.9	6.49	0.89	0.306625	0.222082	0.528707	69.7	20.4	32.5	37.8	7.62	84	48.9
19	1	54	12	1	59	0.272	184.2	80.2	82.2	57.4	35	0.71	1.64	52.9	4.76	33.2	26.9	2.32	97.7	1.66	26.5	62.3	4.57	20.5	20.5	79.6	22.9	59.6	77.1	31.1	1.9	19.3	2.82	3.03	40.7	5.93	25	2.73	1.48	0.0984456	0.146114	0.24456	84.9	11.4	5.71	79.5	1.11	36.5	7.37
20	0	80	6	1	1440	0.671	539.1	542.8	79.8	42.3	47.4	1.83	0.892405	39.71	5.35	75.9	26.8	26.1	73.9	3.91	49.3	19.6	3.98	41	56.9	84.1	28.4	55	71.6	32	8.42	29.7	4.8	8.47	49.9	6.33	12	9.88	2.98	0.283502	0.161616	0.445118	68	10.7	15.5	43.1	1.79	44.9	34.1
21	1	32	8	0	109	0.71	500	535.5	97.6	80.8	15.9	0.63	5.08176	69.6	5.66	23.38	19.02	1.1	98.9	1.42	14.3	79.2	3.75	16.52	13.2	63.9	48.6	50.1	51.4	43	0.35	10.9	3.2	2.14	47.2	8.54	16.8	2.97	0.18	0.0321101	0.293578	0.325688	65.3	2.96	7.17	86.8	2.24	38.8	6.46
22	1	18	10	1	98	0.474	162.2	78.4	70.8	52.3	38.6	0.72	1.35492	35.1	5.73	42.7	44.2	3.33	96.7	5.7	25.4	33.02	4.9	60.6	31.4	64.1	48.4	25.1	51.6	38.5	22.9	33.7	9.04	15.8	36.2	4.89	20.4	23.9	0.61	0.679525	0.268249	0.947774	81.8	33.3	18.2	68.6	5.78	48.6	15.1
23	1	66	7	0	163	0.581	361.1	316.5	71.9	45	47.7	0.9	0.943396	45.3	5.09	31.6	35.8	7.76	92.2	1.05	35.1	31.8	3.53	43.3	40	93.2	9.28	78.4	90.7	30.5	4.32	20.3	3.67	8.18	44.7	13.4	8.69	5.68	12.2	0.212808	0.180788	0.393596	71	8.79	15.1	60	4.04	91.1	25.3
24	1	64	10	0	57	0.539	100	19.3	73.3	62.1	27.9	1.16	2.22581	31.4	3.95	32.6	49.7	1.34	98.7	3.95	12.39	34.8	6.2	60.4	19.8	77.5	25	42.4	75	24.5	20.3	14.4	8.01	14.5	29.5	16.9	31.6	11.9	2.56	1.40972	0.55625	1.96597	84.3	12.9	17.9	80.2	2.56	26.2	13.6
25	1	34	8	0	536	0.48	113.6	24.3	75.8	57.6	29.7	0.32	1.93939	35.67	4.94	84.2	22.93	2.22	97.8	3.69	30	23.9	5.8	54.1	9.08	93.7	8.76	34.5	91.2	15.2	50.2	13.1	2.97	38.9	17.8	6.43	82.4	1.74	0.79	3.83206	0.226718	4.05878	72.7	12.4	11.4	90.9	1.81	22.4	2.75
26	0	58	6	0	532	0.85	416.2	298.5	75	52	32.2	0.13	1.61491	42.7	9	45.7	20.29	8.26	91.7	2.53	21.9	59.5	4.53	27.9	23.4	74.9	37.6	35.4	62.4	19.6	7.81	10.7	1.02	17.5	24.6	4.75	38.4	1.5	3.3	0.729907	0.0953271	0.825234	60	16	11.2	76.6	1.56	68.7	16.1
27	1	50	6	1	784	0.595	347.2	306.8	70.1	29.5	59.9	2.13	0.492487	11.4	6.06	69.2	31	4.82	95.2	1.58	15.9	12.5	5.25	80.1	63.9	36.6	75.9	18.1	24.1	31.5	5.02	31.7	7.05	7.84	40.5	8.64	3.24	9.08	0.51	0.15836	0.222397	0.380757	57.9	10.5	10.7	36.1	13.3	91.3	38.6
28	1	23	6	1	103	0.285	348.4	297.6	85.5	50	44.4	0.65	1.12613	21.4	7.25	55.8	33.3	11.6	88.4	4.73	25.5	53.6	3.44	31.2	20	52.4	60.1	46.9	39.9	11.4	22.6	10.5	1.33	26.4	25.3	5.26	40.4	4.22	0.15	2.15238	0.126667	2.27905	63.7	8.13	15.5	80	7.53	91.3	11
29	1	36	18	1	1415	0.285	195.9	30.5	50.4	29.8	53.6	0.51	0.55597	21.3	8.3	67.5	21.56	34.1	55.9	0.39	12.9	32.2	4.17	76.6	13.6	40.6	1.86	28	98.1	46.85	18.5	7.82	6.4	15	25.7	6.18	13.9	11.6	1.3	2.36573	0.818414	3.18414	72.8	6.36	13.3	86.4	3.73	31.4	7.9
30	1	31	11	0	427	0.199	355	334.2	78.4	45.6	40.9	0.68	1.11491	13.6	6.73	74.7	22.67	6.09	93.9	3.48	38.5	32.2	4.28	38.8	26.1	80.6	31.9	80.4	68.1	20.3	25	21.4	1.77	21.6	25.4	3.69	24.3	1.69	1.31	1.16822	0.0827103	1.25093	75.9	18.5	21.6	73.9	4.19	87.7	14.7
31	1	22	13	1	197	0.389	332.1	451.2	83.4	55.7	40.8	0.11	1.3652	54.7	3.98	18.7	40.4	1.19	98.8	1	15.1	68.5	4.64	25.6	25.9	38.9	73.6	20.2	26.4	34	9.68	8.92	1.26	19.3	21.8	16.5	35	1.28	6.67	1.0852	0.141256	1.22646	70.3	22.1	14.9	74.1	5.55	98.8	9.33
32	1	35	10	0	554	0.586	337.3	222.8	69.7	55.2	39.5	0.55	1.39747	25.7	5.37	44.7	42	11.2	88.8	4.45	54.9	18.4	4.66	35.8	59.7	27.4	85.1	13.5	14.9	21	30	17	0.59	14	42.2	4.79	65.2	2.35	5.6	1.76471	0.0347059	1.79941	75.4	9.5	12.5	40.3	13.2	81	46.9
33	1	39	6	0	78	0.535	332.9	298.1	83.4	53.6	37.2	0.95	1.44086	21.4	8.03	50.8	37.5	2.93	97.1	5.26	11.17	60.7	5.41	36.5	18.6	68.3	44.2	43.6	55.8	14	33.5	15.5	1.7	30.5	19.5	6.97	53.3	0.4	0.54	2.16129	0.109677	2.27097	58.8	12.7	11.8	81.4	2.66	55.1	12.4
34	1	55	8	1	126	0.864	198.1	20.3	63.3	56.6	41.1	0.68	1.37713	50.4	10.34	27.8	29.1	3.52	96.5	1.89	26.3	18.3	4.01	65.2	42.6	93.7	8.79	30.9	91.2	25.3	11.4	16.5	3.36	18.9	22.2	12.3	54.7	1.8	4.3	0.690909	0.203636	0.894545	74.4	23.4	27.6	57.4	3.47	94.4	18.4
35	1	23	11	0	1380	0.652	105.5	67.2	73.5	45.7	41.6	0.39	1.09856	20.8	4.35	42.8	49.8	6.98	93	3.39	35	39.7	4.45	34.7	33	29.7	82.8	9.91	17.2	14.3	24	18.1	2.13	19.4	32.4	4.99	38.5	4.8	3.43	1.32597	0.11768	1.44365	77	13.8	10.5	67	1.93	24.4	12.5
36	1	54	15	0	1500	0.275	498.9	454.4	77.5	52.1	39.8	1.44	1.30905	10.1	6.3	64.4	26.9	32.8	67.2	3.63	38.1	10.2	3.63	61.9	77.6	86.4	26.1	60.8	73.9	14.5	15.3	19.7	1.18	16.6	37.9	6.96	16.9	4.09	1.71	0.77665	0.0598985	0.836548	74.3	11.3	20.5	22.4	8.01	71.1	46.9
37	1	21	7	1	302	0.117	498.6	321.5	80.6	77.3	18.9	0.9	4.08995	16.1	4.86	53.1	43.6	16.8	83.2	1.88	27	15.8	13.5	57.6	52.3	84.5	28	22.7	72	15.5	11.5	12	2.1	15	22.5	13.1	16.7	5.84	0.39	0.958333	0.175	1.13333	68.6	12.3	25.9	47.7	5.45	70.1	35
38	1	85	21	0	390	0.181	286.9	344.3	76.2	54.4	39.7	0.65	1.37028	45	4.05	15.6	53	18.3	81.7	1.87	51.6	36.6	5.51	20.1	57.3	45.1	67.4	34.7	32.6	16.9	16.2	15.83	6.31	23.5	23.6	14.07	35.3	0.35	4.15	1.02337	0.39861	1.42198	82.7	15.2	23.3	42.7	10.6	93.7	49.8
39	1	35	5	0	74	0.495	200	31.9	80.8	74.8	13.1	0.24	5.70992	38.3	11.89	39	28.5	2.42	97.6	1.32	19.5	36.1	8.09	50.1	22.4	87.9	24.6	35.2	75.4	31.9	25.1	13.28	0.69	55.6	4.13	14.13	71.6	1.83	2.04	1.89006	0.0519578	1.94202	57.1	24.1	18.3	77.6	1.45	44	9.29
40	1	68	21	0	2880	0.163	534.5	800	74.7	62.3	28.5	0.38	2.18596	19.4	3.9	23.6	20.75	31.9	48.1	3	35.4	45.9	4.02	28.5	38.4	21.59	90.9	12.7	99.09	44.82	4.08	12.31	6.93	17.3	21.9	7.97	12.1	0.17	5.51	0.331438	0.562957	0.894395	89.5	4.32	21.5	61.6	3.42	84.3	17.4
41	1	30	6	1	482	0.591	339.3	302.6	85.8	43.1	50.2	2.23	0.858566	20.9	8.98	58.4	29.4	22.9	77.1	1.99	19	35.5	8.06	51.2	36.4	56.1	56.4	29	43.6	36.8	11.9	16.4	6.35	18.9	34.1	19.59	26.7	1.87	8.86	0.72561	0.387195	1.1128	61.6	15.7	28.5	63.6	1.94	56	24.1

## Sheet: HC
number	T cell	CD4+T cell	CD8+T cell	Double-positive T cell	Th/Tc	Naive CD4+T cell	Terminally differentiated CD4+T cell	Central memory CD4+T cell	Effector memory CD4+T cell	CD28-CD4+T cell	CD28+CD4+T cell	Regulatory T cell	Naive CD8+T cell	Terminally differentiated CD8+T cell	Central memory CD8+T cell	Effector memory CD8+T cell	CD28-CD8+T cell	CD127+ effector memory CD8+T cell	CD127- effector memory CD8+T cell	CD127+ terminally differentiated CD8+T cell	CD127-terminally differentiated CD8+T cell	Tfh	Th1	Th2	Th17	Tfh1	Tfh2	Tfh17	Tc1	Tc2	Tc17	Th1/Th2	Th17/Th2	(Th1+Th17)/Th2	CXCR5-PD1+CD4+T cell	CXCR5+PD1+CD4+T cell	PD1+CD8+T cell	CD28+CD8+T cell	HLADR+CD8+T cell	HLADR＋CD38+CD8+T cell	CD28-CD57+CD8+T cell
1	68.2	44.5	47.8	1.06	0.930962	33.8	3.69	24.9	35.5	2.03	98	2.87	45.6	31.3	2.35	20.8	31.9	64.6	23.4	80.4	79.6	16.9	16.9	9.32	4.21	4.21	19.6	1.3	54.5	0.65	3.2	4.11	0.45	0.45	0.45	0.45	17.1	68	13.4	19.5	17
2	72.2	49.9	35.2	0.85	1.41761	43.9	1.78	22	28	2.44	97.6	6.62	25.2	25	3.53	46.2	44	20.4	67.6	88.3	81.7	16.7	16.7	9.57	0.9	0.9	17.2	9.64	51.4	0.77	0.41	2.04	0.094	0.094	0.094	0.094	19.3	44.6	9.76	17.3	34.6
3	69.9	33.5	37.1	1.08	0.902965	43.2	3.58	24.6	32.8	3.64	96.4	3.63	17.52	39.9	5.1	37.5	48.2	51.7	36.3	31.9	68.1	17.6	17.6	10.3	2.34	2.34	29.1	15	56	1.48	0.52	2.84	0.23	0.23	0.23	0.23	16.3	53.1	14.4	39.2	13.7
4	70.9	48.5	47.3	0.54	1.02537	38	4.46	22.5	41.7	0.55	99.4	4.25	59.5	17.4	2.05	21.1	26.6	43.7	44.3	17.1	82.9	15.9	15.9	6.14	1.53	1.53	25.3	12.2	49.3	0.83	3.18	1.78	0.25	0.25	0.25	0.25	21.4	73.4	9.72	10.8	16.2
5	68.4	46.4	40	1.8	1.16	38.2	8.13	26.2	14.4	2.83	97.2	4.22	45.4	16.8	3.55	34.2	25.8	52.9	35.1	25.3	74.7	14	14	10.3	2.67	2.67	25.2	4.9	50.9	0.84	4.92	1.89	0.26	0.26	0.26	0.26	8.28	73.7	9.02	19.8	14.1
6	77.3	51.4	47.9	0.36	1.07307	33.1	2.77	32.9	43.3	8.9	91.1	3.19	25.7	39.2	3.28	31.9	52.3	31.9	56.1	19	81	23.2	23.2	16.8	2.34	2.34	20.5	7.3	48.3	0.99	1.1	1.23	0.14	0.14	0.14	0.14	16	45.4	8.21	21.4	39.3
7	63.1	41.5	29.6	0.9	1.40203	30.1	7.13	45.7	49.3	0.11	99.9	8.21	31.1	45.7	8.26	44.9	20.1	62.3	25.7	49	51	21	21	9.56	2.67	2.67	34.4	9.6	38.7	2	5.1	0.93	0.28	0.28	0.28	0.28	17.3	79.8	15	12.5	3.58
8	86.2	41.1	66.2	2.51	0.620846	37.3	1.12	49.7	30.2	1.19	98.8	2.97	37.2	44.9	3.6	4.2	54	83.5	4.55	93.9	6.08	9.86	9.86	16.2	2.12	2.12	38.2	8.41	24.6	2.49	3.19	0.61	0.13	0.13	0.13	0.13	6.92	44.4	4.36	45.8	40.1
9	97.9	44.6	57.2	4.56	0.77972	60.9	7.34	30.2	35.1	5.89	94.1	2.86	17.83	37	2.11	43	81.2	29.5	58.5	63.7	86.3	14.6	14.6	9.96	3.16	3.16	22.8	9	24.5	0.73	0.73	1.72	0.32	0.32	0.32	0.32	4.68	18.8	4.37	11.1	59.9
10	82.1	65.1	38.7	0.63	1.68217	49.2	8.95	37.4	44.2	9.73	90.3	4.26	38.4	41.5	4.06	16	41.3	47.1	40.9	57.5	82.5	22.1	22.1	10.1	3.63	3.63	30.2	3.7	38.1	1.11	2.09	1.78	0.36	0.36	0.36	0.36	8.43	52.5	9.81	16	27.2
11	77.9	44.3	37.4	0.71	1.18449	45.5	8.02	29.6	48.2	0.46	99.5	5.42	58.8	19.4	2.15	19.7	29.5	45.4	42.6	45.9	54.1	21.5	21.5	10.8	3.23	3.23	33.3	5.8	39.3	0.59	1.34	1	0.3	0.3	0.3	0.3	14.8	68.4	3.86	11.1	16.1
12	80.6	44.5	43	1.53	1.03488	56.7	2.83	30.4	48.1	0.65	99.4	5.33	41.8	15.7	1.58	40.9	18.8	73.3	14.7	54.8	45.2	16.9	16.9	10.1	4.18	4.18	27	6.2	40.8	2.11	0.3	1.83	0.41	0.41	0.41	0.41	11.6	80.2	1.46	32.6	5.31
13	79	46.7	30.7	1.04	1.52117	46.6	2.44	34.1	33.5	2.2	97.8	5.04	32.2	47.9	3.24	46.7	32.2	43.5	44.5	22.7	77.3	18.6	18.6	12.4	3.49	3.49	37.3	3.9	45.2	2.08	7	2.27	0.44	0.44	0.44	0.44	17.6	67.6	8.6	5.99	20.2
14	71.1	56	40.3	0.69	1.38958	42.5	1.93	35	53.1	4.93	95.1	3.55	45.4	18.5	2.15	33.9	27.1	38.2	49.8	57.5	82.5	18.8	18.8	10.4	5.66	5.66	28.9	11	50.1	1.68	3.94	1.86	0.54	0.54	0.54	0.54	17.6	66.2	12.6	16.1	10.8
15	87.1	38.7	26.9	1.18	1.43866	49.7	1.83	32.7	23	0.93	99.1	4.61	59.6	20.7	4.4	15.3	25.9	53.9	34.1	23.1	76.9	17.7	17.7	11.7	0.89	0.89	24.3	6	50.2	2.02	3	2.32	0.85	0.85	0.85	0.85	7.93	70.6	2.16	12.7	11.7
16	85.8	62.4	43.3	1.04	1.44111	47	2.31	28.5	32.3	3.19	96.8	3.77	30.1	39.5	0.85	29.5	34.9	63.7	24.3	96.3	83.7	16.8	16.8	14.2	0.04	0.04	28.3	6	29	2.3	2.7	1.4	0.35	0.35	0.35	0.35	9.14	57.7	5.98	23.8	12.8
17	70.7	52.2	41.6	0.86	1.25481	56.9	6	22.8	26.2	5.67	94.3	4.17	38.8	24	0.8	36.4	31.1	51.9	36.1	29.9	70.1	15.7	15.7	18	0.85	0.85	40.7	8.5	14.9	1.2	0.6	0.61	0.32	0.32	0.32	0.32	10	62.6	3.77	17.3	25.8
18	83.5	51.1	37	1.84	1.38108	34.4	5.87	22.1	21.7	4.05	95.9	3.4	27.3	23.5	1.57	47.6	26.6	63.3	24.7	34.7	65.3	13.3	13.3	17.1	3.2	3.2	29.4	4.5	24.4	3.52	8	1.4	0.77	0.77	0.77	0.77	13.7	65.2	11.1	9.66	18.7
19	88	55.9	47.2	1.03	1.18432	46.6	7.2	42.4	30.2	3.54	96.5	5.26	39.2	45.2	1.78	13.8	37.3	63.1	24.9	53.5	46.5	19.8	19.8	19.1	1.86	1.86	35.9	5.1	13.2	2.31	2.1	0.71	0.31	0.31	0.31	0.31	6.17	53.3	13.8	6.7	27.4
20	88.4	39.3	35.6	1.1	1.10393	34.7	1.28	20.8	31.7	1.05	99	4.28	73.1	15.2	3.67	8	11.1	73.4	14.6	46	54	13.3	13.3	10.6	3.33	3.33	25.1	5.4	40.4	0.74	3.98	0.85	0.31	0.31	0.31	0.31	6.13	84.1	2.43	30	6.73
21	84	33.5	42.1	0.98	0.795724	47.1	7.26	44.1	25.4	4.9	95.1	3.52	23.4	39.2	1.86	35.5	61.6	39.7	48.3	13.2	86.8	16.4	16.4	25.7	1.17	1.17	31.2	1.9	13.6	2.27	1.2	0.51	0.32	0.32	0.32	0.32	17.6	41.9	12.7	24.3	44.2
22	90.7	52.6	28.2	0.9	1.86525	31.6	8.5	37.1	44.7	2.42	97.6	4.83	36.3	17	5.8	30.9	24.4	57	31	38.8	61.2	13.8	13.8	13.1	2.71	2.71	36.4	9	42.1	1.67	7.98	0.61	0.21	0.21	0.21	0.21	4.42	75.8	7.66	13	4.77
23	75.5	48.5	38.6	1.57	1.25648	38.5	5	35.9	39.5	1.74	98.3	3.13	41.4	19.16	8.77	40.7	26.4	45.4	42.6	85.9	74.1	25.8	25.8	17.4	1.63	1.63	29.7	1.8	22.1	9.79	9.21	1.83	0.44	0.44	0.44	0.44	15.6	73.2	13.9	13	14.3
24	68.4	47.8	27.5	2.33	1.73818	49.6	1.1	29.8	41.5	5.86	94.1	8.05	52.2	14.5	3.91	29.4	27.7	36.7	51.3	47.9	52.1	23.3	23.3	9.78	4.56	4.56	27.5	2.9	20.5	2.42	6.97	1.9	0.47	0.47	0.47	0.47	17.6	65.8	14.8	8.09	10.3
25	82.7	58.6	22.8	0.56	2.57018	36.1	2.86	29.3	13.2	9.84	90.2	3.88	45.6	13.8	5.73	34.8	20	65.4	22.6	33.1	66.9	12.4	12.4	11.6	3.12	3.12	29	2.6	21	3.06	5.83	1.47	0.27	0.27	0.27	0.27	21.6	76.1	7.6	4.18	7.88
26	84.2	40.9	59.4	0.86	0.688552	36.9	3.02	23.9	25.3	11.9	88.1	2.21	38.9	29.3	1.6	30.2	40.7	39	49	78.37	91.6	11.8	11.8	11.6	1.19	1.19	38.3	4.2	15.6	1.15	9.88	1.01	0.45	0.45	0.45	0.45	12.2	63.4	8.96	10.6	22.1
27	80.3	42.1	29.6	3.59	1.4223	36.2	4.73	30.3	35	10.5	89.5	5.61	18.7	17.2	5.51	58.7	55.5	49.6	38.4	34.7	65.3	15.2	15.2	12.1	2.38	2.38	18.3	6.8	45.3	1.7	4.29	2.37	0.2	0.2	0.2	0.2	14.1	41.8	3.43	31.1	27.3
28	67.5	41.9	44.1	0.78	0.950113	46.4	2.78	33.5	22	2.22	97.8	4.38	24.2	42	2.74	31.1	66.3	56.4	31.6	49.4	50.6	27.3	27.3	18.2	1.7	1.7	26.6	2.5	33.9	1.54	1.47	1.23	0.093	0.093	0.093	0.093	6.88	32.1	0.95	30.4	50.3
29	76.9	40.6	55.2	1.38	0.735507	39.8	2.85	28	44.9	6.34	93.7	4.5	17.08	43.7	1.18	28	68.9	45.4	42.6	56.9	83.1	22.6	22.6	14.7	4.96	4.96	28.5	9.4	32	1.92	0.4	1.95	0.34	0.34	0.34	0.34	23.6	31.9	1.28	33.8	37.1
30	66.1	55.1	32.3	0.82	1.70588	40.8	3.92	27.4	20.6	2.53	97.5	5.85	43.7	32	3.37	20.9	52.6	48.2	39.8	52.7	77.3	13.9	13.9	11.5	2.11	2.11	32	6.7	55.3	1.01	1.78	1.04	0.18	0.18	0.18	0.18	9.97	64.6	6.26	21.5	22.1
31	63.7	66.2	44.3	1.74	1.49436	40.9	7.66	24	30.1	4.59	95.4	3.27	39.9	10.6	4.97	44.6	42.5	61.4	26.6	32	68	20.3	20.3	16.7	3.25	3.25	29.9	2	60.7	1.69	9.13	1.86	0.19	0.19	0.19	0.19	10.1	56.4	3.75	21.4	5.63
32	84.5	43.3	28.7	0.41	1.50871	43.7	2.15	23.9	38.1	3.42	96.6	6.77	50.9	13.7	7.18	28.3	47.1	75.9	12.1	62.5	37.5	9.12	9.12	15.5	0.74	0.74	25.4	1.5	51.9	1.62	2.8	0.94	0.048	0.048	0.048	0.048	14.8	77.6	4.82	23.1	6.55
33	83.2	55.3	43.7	1.11	1.26545	52.3	7.42	29.1	19.1	2.07	97.9	3.97	27.3	45.2	1.26	16.3	41.4	23.2	64.8	28.1	71.9	14.2	14.2	12.6	1.14	1.14	25.6	2	40.8	1.35	2.41	1.31	0.09	0.09	0.09	0.09	16.6	58.1	3.3	31.5	33
34	84.6	39.7	33.1	0.51	1.1994	44.3	3.76	25.8	29.4	1.34	98.7	3.86	42.1	31.7	6.76	19.5	45.5	71.6	16.4	62.3	37.7	22	22	11.3	1.84	1.84	26.9	5.4	49.1	1.11	0.25	1.55	0.16	0.16	0.16	0.16	12.1	52.8	7.01	64.2	16.6
35	81.2	54.7	38.8	0.69	1.40979	27.4	6.3	21.4	47.6	1.93	98.1	3.48	34.8	29.7	1.72	33.8	59.7	66.5	21.5	58.9	41.1	6.98	6.98	10.4	0.94	0.94	26.9	15.7	38.5	1.02	2.89	1.19	0.09	0.09	0.09	0.09	8.29	39.4	7.14	16.9	36.4
36	67.3	44.1	44.4	2.07	0.993243	34.4	3.96	24.6	35.6	7.6	92.4	2.68	21.6	20.3	1.42	56.7	23.3	70.2	17.8	56.2	43.8	16.3	16.3	12.6	1.72	1.72	19.8	13.1	51.4	2.26	1.5	2.4	0.37	0.37	0.37	0.37	15.8	76.5	3.86	27.6	11
37	69.6	49.8	38	5.51	1.31053	46.3	4.98	26.6	54.4	4.43	95.6	3.71	37.9	44.2	1.38	16.4	49.4	72.7	15.3	71.9	28.1	12.9	12.9	12.6	4.42	4.42	24.7	8.1	24	2.27	1.68	0.87	0.35	0.35	0.35	0.35	6.55	57.5	5.46	47.1	23.4
38	68.4	55.4	43.2	0.75	1.28241	38	7.2	8.36	60.1	3.9	96.1	8.75	24.3	25.1	1.4	49.2	18.5	60.9	27.1	77.7	22.3	15.7	15.7	10.2	4.32	4.32	27	6.8	55.3	1.65	0.8	2.19	0.42	0.42	0.42	0.42	16.1	81.3	3.29	35.9	3.99
39	85.2	49	44.4	0.42	1.1036	43	5.16	7.6	28.5	3.52	96.5	3.26	48.7	44.4	1.86	38	50.2	18.4	69.6	15.8	84.2	14.2	14.2	9.2	2.04	2.04	24.4	7.5	24.3	0.53	3.37	1.35	0.22	0.22	0.22	0.22	7.37	47.6	2.83	25.1	35.3
40	84.7	54.2	41.1	0.62	1.31873	46.4	2.02	25.8	34.6	6.78	93.2	3.4	38.8	47.1	4.52	39.6	34.2	28.9	59.1	55.19	94.8	22.6	22.6	11.2	3.19	3.19	18.1	3.9	54.3	1.66	0.8	3.12	0.28	0.28	0.28	0.28	11	65.8	3.51	9.34	12.3
41	78.5	55.4	32.2	0.8	1.7205	31.7	4.99	26.5	22.4	3.33	96.7	3.15	52.8	19.9	2.58	24.7	41.5	38.6	49.4	44.1	55.9	19	19	8.96	1.41	1.41	23.5	13.9	65.7	0.9	0.56	1.92	0.16	0.16	0.16	0.16	25.3	58.9	4.25	19.8	15
42	83.5	52.1	40.2	2.7	1.29602	57.5	5.58	43.9	21.8	5.13	94.9	4.54	21	35.8	4.67	38.6	39.9	77.6	10.4	85.9	14.1	21.7	21.7	18	2.23	2.23	34.4	7.34	43.6	5.18	0.3	1.03	0.12	0.12	0.12	0.12	10.3	65.1	3.72	45.5	21.1
43	68.2	43.2	42.7	1.47	1.01171	68.5	1.85	20.1	33.4	5.64	94.4	2.02	27.5	31.8	1.16	59.5	20.9	62.9	25.1	34.4	65.6	16.8	16.8	7.52	4.18	4.18	20.7	0.17	46.3	2.55	5.1	3.78	0.56	0.56	0.56	0.56	17.5	77.4	5.18	15.8	10.5
44	76.1	51.2	43.4	1.31	1.17972	40.5	4.59	10.3	18.1	1.09	98.9	3.01	46.7	34.7	1.8	16.8	42.2	72.1	15.9	75.8	24.2	11.8	11.8	10.6	0.82	0.82	30.3	7.63	42.6	3.32	2.89	1.12	0.077	0.077	0.077	0.077	10.4	57.9	1.85	61.1	39.4
45	77.6	53.7	47.4	0.86	1.13291	39	5.58	37.3	45	3.03	97	2.49	40.7	28.17	10.7	40.5	32	56.3	31.7	23.4	76.6	26.6	26.6	10.4	3.75	3.75	20	7.84	62.6	1.38	9.84	4.05	0.36	0.36	0.36	0.36	17.1	64.9	1.76	46.3	10.5
46	88.3	54.4	39.3	0.41	1.38422	37.4	4.72	19.3	31.5	0.85	99.2	3.05	79.3	33.71	5.61	11.4	24	63.8	24.2	39.4	60.6	9.58	9.58	7.87	3.38	3.38	14.9	7.94	57.6	0.33	4.87	1.87	0.43	0.43	0.43	0.43	6.96	75.3	1.56	35.4	3.78
47	80.5	58.4	43.7	0.62	1.33638	22.6	1.25	20.7	19.4	1.35	98.6	3.18	76.6	34.91	4.49	14.1	30.6	37.2	50.8	18.4	81.6	12.4	12.4	8.61	3.01	3.01	15.8	9.03	51.4	0.45	4	1.8	0.35	0.35	0.35	0.35	3.31	66.8	2.18	19.9	14
48	82.9	50.3	26.9	0.66	1.86989	19.5	8.27	25.7	37.7	4.31	95.7	8.77	54.2	16.82	8.64	30.3	36.1	63.4	24.6	40.7	59.3	19.9	19.9	5.9	1.96	1.96	15	6.35	70.6	1.74	5.73	3.22	0.33	0.33	0.33	0.33	15.7	63.2	1.47	34.4	17.4
49	73	54.7	36.3	0.71	1.50689	20.8	1.09	26.1	31.7	3.96	96	2.98	67.3	37.46	7.58	17.7	24.8	71.3	16.7	50.6	49.4	14	14	11	1.03	1.03	11	5.93	3.61	29.2	1.29	0.11	0.015	0.015	0.015	0.015	10.1	73.8	1.76	27.2	3.31
50	72.5	37.9	44.6	2.66	0.849776	43.4	4.9	28.6	25.2	8.78	91.2	2.36	42.8	24.6	1.83	30.7	47.5	77	11	67.8	32.2	24.1	24.1	4.62	1.08	1.08	14.6	9.94	53	0.98	7.61	3.55	0.23	0.23	0.23	0.23	17.3	52.7	2.59	24.9	17.8
51	81.6	47.3	35.3	3.65	1.33994	51.5	1.52	28.1	32.2	8.69	91.3	3.55	40.8	27.9	6.09	35.3	41.7	75.4	12.6	63.7	36.3	16.3	16.3	7.97	1.21	1.21	26.6	6.6	74	3.19	1.75	2.65	0.15	0.15	0.15	0.15	22.3	61.6	3.47	46.9	22.6
52	80.6	55.6	41.1	0.37	1.3528	19	4.65	28.9	31	4.29	95.7	3.12	37.3	18.1	2.94	41.6	44	47.9	40.1	40.5	59.5	20.4	20.4	5.48	1.53	1.53	14.9	9.85	67.7	0.65	9.22	4.05	0.28	0.28	0.28	0.28	21.1	53.9	1.25	31.6	17.7
53	74	46.3	46.3	0.98	1	62.9	1.49	19.3	32	5.41	94.6	4.16	49.6	27.3	3.61	29.5	37.4	63.2	24.8	33.8	66.2	15.3	15.3	9.13	2.01	2.01	12.1	8.48	69.2	1.48	2.34	2.37	0.22	0.22	0.22	0.22	25.6	62.3	1.36	31.5	15.5
54	82.3	52.1	38.2	1.31	1.36387	45.6	4.56	28.6	51.1	2.49	97.5	4.96	21.6	34	7.09	37.3	38.9	52.1	35.9	21.2	78.8	19.4	19.4	14.4	3.84	3.84	33.8	7.38	41.3	8.91	1.73	2.09	0.27	0.27	0.27	0.27	21.9	59.3	0.75	34.6	33.3
55	70.4	57.3	41.9	1.42	1.36754	43.4	5.42	28.3	25.3	5.07	94.9	2.73	25.5	15.2	3.38	56	47.7	21.3	66.7	87.6	92.4	21.1	21.1	8.89	1.27	1.27	26.2	13.9	27.7	0.94	5.36	1.24	0.14	0.14	0.14	0.14	17.2	50.1	0.93	34.3	42.3
56	66.3	49.2	38.6	1.3	1.27461	31.7	1.27	40.2	28.9	1.38	98.6	2.72	17.27	28.55	7.44	66.7	18.3	67.1	20.9	30.7	69.3	26.5	26.5	16.4	1.85	1.85	29.6	12.1	56.4	1.43	5.6	2.31	0.23	0.23	0.23	0.23	15	82	1.94	36.1	9.69
57	84.6	52.9	39	1.4	1.35641	45.1	1.05	21	21	2.03	98	2.35	22.9	33.6	4.87	58.6	50.9	79.1	8.93	67.3	32.7	17.1	17.1	12.9	1.88	1.88	33.9	10.8	34.1	2.61	1.72	2.28	0.38	0.38	0.38	0.38	21.3	48.3	0.81	47.6	37.4
58	95.7	49.6	44.6	0.67	1.11211	50.2	1.7	34.3	25.4	12.4	87.6	2.83	11.62	40.7	2.52	45.2	71.9	35.4	52.6	46.96	93	12.8	12.8	12.9	1.66	1.66	34.2	9.45	23.1	2.31	0.27	1.35	0.13	0.13	0.13	0.13	16.9	28.5	0.35	43.8	51
59	57.8	50	55.4	0.49	0.902527	41.7	4.51	39.2	26.6	11	89	8.56	22.1	40	1.57	36.3	44.3	74.7	13.3	67.1	32.9	20.5	20.5	13.3	1.75	1.75	25.6	11.1	43.6	1.02	2.17	1.9	0.13	0.13	0.13	0.13	16.5	55	1.78	33.3	34.5
60	66.8	55.6	37.6	1.89	1.47872	44.6	1.53	26.1	44.3	4.39	95.6	2.94	19.3	21	3.14	56.6	53.3	72.2	15.8	78.4	21.6	22.5	22.5	14.5	1.82	1.82	30.8	5.4	39.1	3.44	3.57	1.41	0.13	0.13	0.13	0.13	25.9	46.7	3.9	53.7	37.6
61	71.4	66.4	49.6	4.27	1.33871	29.4	0.42	38.4	21.7	4.78	95.2	2.6	12.56	51.5	2.32	33.6	60.7	79.8	8.22	87.4	12.6	26.1	26.1	21.4	2.23	2.23	35.4	13.1	40.6	1.82	0.48	1.5	0.1	0.1	0.1	0.1	22.8	37	0.92	47	55.6
62	68.9	48.6	34.6	2	1.40462	42.4	1.56	24.5	36.1	1.4	98.6	4.67	54.4	15.8	2.78	27	52.4	70.8	17.2	28.3	71.7	18.5	18.5	18.4	1.16	1.16	32.7	4.4	25.6	2.57	4	1.69	0.28	0.28	0.28	0.28	19.7	46.8	1.6	26.4	9.4
63	63.9	60.6	53.8	1.45	1.12639	57.5	8.76	24.8	29.3	4.75	95.3	3.95	33.2	22.3	2.32	42.2	40.5	46.3	41.7	59.9	90.1	17.2	17.2	11.1	3.76	3.76	32.5	12.1	18.8	2.06	4.7	1.8	0.34	0.34	0.34	0.34	7.43	58.9	2.78	66.3	17.3
64	70.7	45.6	46.4	1.01	0.982759	35.9	4.83	26.6	12.9	6.23	93.8	3.3	21.4	34.2	1.9	42.5	27.7	26.7	61.3	10.8	89.2	21.1	21.1	18	1.9	1.9	35.4	9.5	18.4	3.82	5.93	1.84	0.27	0.27	0.27	0.27	42.3	72.1	1.55	16.3	22.2
65	77.6	64.8	39.1	1.07	1.65729	45.5	1.47	26.6	22.3	2.53	97.5	8.74	32.4	47.1	4.32	16.1	48.6	40.6	47.4	19.3	80.7	15.5	15.5	9.76	3.81	3.81	25.5	11.4	16	1.87	3.68	1.81	0.39	0.39	0.39	0.39	8.47	50.6	0.82	33.3	36.8
66	60.1	57.4	37.8	1.38	1.51852	38.5	1.02	44.7	38.6	2.68	97.3	2.42	31.9	17.8	4.58	45.6	49.9	63.6	24.4	17.4	82.6	27	27	22.8	4.96	4.96	38	6.8	24.4	4.7	0.6	0.99	0.22	0.22	0.22	0.22	15.7	48.6	2.2	13.5	10.5
67	62.7	50.1	28.5	1.3	1.75789	61.5	5.49	28.3	32.5	2.85	97.1	6.14	30.8	33.8	3.96	31.5	24.9	60.4	27.6	17.8	82.2	13.8	13.8	13.5	1.26	1.26	32.9	8.1	26.3	4.83	2.2	0.92	0.093	0.093	0.093	0.093	16.7	74.6	4.36	15.9	14.1
68	67.1	48.8	27.7	0.78	1.76173	44.6	0.73	29.5	36.9	1	99	4.8	41.3	9.67	3.39	45.6	27.3	34.3	53.7	14.4	85.6	19.7	19.7	10.6	1.16	1.16	26.5	7.34	19.4	2.57	4.41	1.29	0.11	0.11	0.11	0.11	22.9	71.8	1.9	44.7	13.8
69	68.7	39.5	23	1.94	1.71739	57.7	1.49	27.1	43.9	17	83	3.71	38.2	19.2	5.72	36.9	36.6	35.1	52.9	23.9	76.1	13.5	13.5	14.6	1.78	1.78	43.8	0.17	34.1	5.18	3.08	0.7	0.12	0.12	0.12	0.12	17.9	62.8	4.47	12.8	27.2
70	67.8	38.7	46.2	1.06	0.837662	53.2	1.52	30	40	2.35	97.6	3.05	25.7	36	4.1	34.2	38.8	50.5	37.5	50.1	89.9	15.5	15.5	16.8	4.35	4.35	37.4	12	16.3	5.28	9.07	1.07	0.26	0.26	0.26	0.26	17.9	60.3	1.92	14.4	30
71	65.4	34	62.7	0.38	0.542265	53.1	4.37	37.6	32.5	1.68	98.3	2.37	18	63.9	1.07	17	71.6	28.4	59.6	43.82	96.2	17.7	17.7	18	2.1	2.1	40.4	7.63	10.5	2.37	4.17	0.79	0.12	0.12	0.12	0.12	7.73	28	1.84	23.3	62.1
72	73.3	57.2	34.1	1.27	1.67742	39.5	4.29	27.9	27.2	6.93	93.1	3.58	30.3	20.4	6.99	42.3	29.5	59.9	28.1	38.6	61.4	21.4	21.4	17.9	5.57	5.57	42.1	7.84	26.4	5.19	8.73	1.37	0.31	0.31	0.31	0.31	22	76.4	3.14	15.4	14.7
73	78.2	73.7	34.5	0.39	2.13623	52.2	4.99	23.7	21.1	1.66	98.3	3.57	47.2	28.03	3.83	40.9	34.5	36.5	51.5	21.3	78.7	18.6	18.6	16	2.8	2.8	34.1	7.94	13.6	2.9	3.96	0.98	0.42	0.42	0.42	0.42	17.5	66.1	2.78	16.3	17.7
74	74	45.1	34.3	1.39	1.31487	33.2	8.44	41.4	39.9	5.04	95	4.05	13.92	22.6	2.74	60.8	41.9	60.1	27.9	68.1	81.9	20.4	20.4	19.6	2.59	2.59	39.9	9.03	35.6	5.61	0.9	2	0.13	0.13	0.13	0.13	25.5	65.3	3.29	14.7	26.7
75	74	45.5	21.9	0.96	2.07763	46.5	3.51	18.5	37.7	3.37	96.6	5.11	44.2	16.8	7.55	31.5	25	28.3	59.7	16.8	83.2	15.3	15.3	10.5	1.18	1.18	26.7	6.35	42.1	3.55	1.39	0.98	0.11	0.11	0.11	0.11	19.2	78.1	5.03	34.8	8.04
76	84.8	45.3	27.8	2.2	1.6295	44.5	8.01	38.7	41.6	8.55	91.4	3.59	32.4	29.1	8.16	30.3	36.7	61.3	26.7	19.7	80.3	24.1	24.1	9.2	2.59	2.59	31.6	5.93	33.1	6.45	6.84	3.45	0.28	0.28	0.28	0.28	15.7	54.9	3.1	24.8	31.1
77	71.8	32.9	38.3	0.63	0.859008	36.9	5.82	43.8	27	3.18	96.8	3.48	22.9	13.6	5.96	57.6	48.7	32.8	55.2	24.3	75.7	18.8	18.8	25.7	5.47	5.47	36.4	9.94	17.9	3.8	8.14	0.84	0.21	0.21	0.21	0.21	25	64.5	4.46	27.5	26.2
78	75.6	38.8	40	0.33	0.97	47.1	4.21	47.2	19.4	0.83	99.2	4.81	18.6	9.42	3.24	68.8	74.7	19.4	68.6	28.6	71.4	25.8	25.8	20.6	2.26	2.26	42.2	6.6	21.2	2.86	6.78	1.05	0.11	0.11	0.11	0.11	18.7	40.8	3.05	35.9	43.7
79	65.5	49.3	39.5	0.93	1.2481	42.4	3.45	28.7	45.3	11.6	88.4	2.15	28.2	47.1	1.1	23.7	67.6	41.5	46.5	23.7	76.3	18.1	18.1	14.1	3.39	3.39	26.9	9.85	13.4	2.69	6.33	1.55	0.52	0.52	0.52	0.52	20.1	38.3	0.46	18.2	44.1
80	61.2	51	39.8	1.36	1.28141	40.5	4.34	34.7	35.9	2.06	97.9	2.75	25.2	26.4	2.08	46.4	34.8	66.1	21.9	14.6	85.4	13	13	7.94	3.54	3.54	26.6	8.48	19.7	3.5	3	2	0.45	0.45	0.45	0.45	10.1	74.6	2.82	29	12.8
81	64.4	50.5	31.9	2.91	1.58307	44.9	2.25	41.2	45.8	3.83	96.2	8.24	35.8	15.2	6.01	43	29.4	64.1	23.9	79.9	20.1	21.4	21.4	19.1	1.88	1.88	41.3	9.39	39	4.26	1.05	0.65	0.098	0.098	0.098	0.098	16.3	55.4	2.77	55.3	20.1
82	70	50.8	43.3	1.07	1.17321	48.4	4.94	29	17.4	7.5	92.5	4.23	13.72	38.4	2	45.9	74.8	6.3	81.7	47.92	92.1	16.3	16.3	12.7	3.86	3.86	38.9	7.38	23	0.92	1.85	0.91	0.3	0.3	0.3	0.3	12.9	25.5	3.56	30.9	56.4
83	80.9	42.9	26.2	1.11	1.6374	53	7.7	26.6	51	17.2	82.8	2.94	29.8	45.5	4.41	20.2	59.4	73.1	14.9	73.1	26.9	16.9	16.9	10.7	2.46	2.46	27.8	9.45	14.4	3.18	0.67	1.1	0.23	0.23	0.23	0.23	27.1	47.6	3.62	34.8	31.5
84	79.3	54.3	32.8	1.44	1.65549	52.5	2.16	32.5	16.7	11.8	88.2	4.49	16.83	31	4.32	47.9	40.4	56.3	31.7	43.9	56.1	14.5	14.5	16.2	2.81	2.81	38.9	9.35	26.1	9.27	4.23	0.98	0.17	0.17	0.17	0.17	26.4	63.9	3.92	19.3	23
85	77.3	37.2	30.4	1.56	1.22368	32.2	2.86	33.9	33.6	2.92	97.1	4.36	15.09	31.5	4.89	48.5	42.7	53.4	34.6	26.3	73.7	18.3	18.3	9.75	3.97	3.97	28.5	9.21	35.2	2.56	1.12	4.46	0.82	0.82	0.82	0.82	18.2	67.9	4.62	8.46	22.8
86	93.6	43.8	60.6	0.73	0.722772	32.4	5.45	48.1	25.6	1.41	98.6	6.75	17.46	32.2	0.86	9.5	77	20.1	67.9	55.83	94.2	27.1	27.1	20.1	1.6	1.6	40.4	9.13	21.6	3.67	1.18	1.07	0.58	0.58	0.58	0.58	8.33	21.6	2.38	32.3	66.7
87	72.3	41.4	35.3	0.56	1.1728	34.1	1.73	26.2	17.4	6.78	93.2	4.41	33.2	17.4	6.67	42.8	45.1	72.2	15.8	68.9	31.1	19.3	19.3	14.7	0.6	0.6	23.7	8.72	36.9	2.57	2.32	2.07	0.72	0.72	0.72	0.72	37.9	62.1	3.21	16.9	20.4
88	83	71.6	38.3	1.14	1.86945	37.5	2.26	16.6	56.5	23.7	76.3	2.85	27.7	11.5	1.58	59.2	62.3	34.2	53.8	42.8	57.2	14.3	14.3	17.9	6.58	6.58	41.7	9.01	22.3	2.95	5.2	0.51	0.37	0.37	0.37	0.37	18.4	46.7	1.87	36.9	31.6
89	89.2	46.3	39.8	0.44	1.16332	40.8	4.19	47	42.6	3.21	96.8	3.88	17.47	52.6	3.26	26.6	61.4	29.9	58.1	60.4	89.6	23.2	23.2	15.4	3.67	3.67	29	9.85	19.1	1.52	5.45	1.12	0.24	0.24	0.24	0.24	11.3	51.3	5.1	41.6	27.7
90	77.8	49.3	45.1	1.09	1.09313	52.1	1.49	28.3	53	4.23	95.8	3.81	21.7	46.7	0.67	30.9	62.8	43.4	44.6	27.9	72.1	8.14	8.14	10.9	5.28	5.28	40.5	7.49	15.9	1.69	7.46	0.98	0.48	0.48	0.48	0.48	30.3	58.1	4.47	18	22.6
91	85	50.8	37.2	0.91	1.36559	53.9	1.23	39	30.7	0.84	99.2	4.25	11.95	52.7	2.59	32.8	79.9	43.2	44.8	32.9	67.1	13.7	13.7	9	2.05	2.05	31.4	3.9	26.3	2.27	1.41	0.81	0.23	0.23	0.23	0.23	18.1	39	4.3	39.1	37.1
92	88	56.1	33.4	1.26	1.67964	45	4.58	25.1	42.3	14.6	85.4	2.33	21.7	28	1.69	48.7	66.9	53	35	59.7	40.3	14.3	14.3	6.81	0.98	0.98	25.7	4.81	27.5	1.43	1.61	1.3	0.14	0.14	0.14	0.14	15.2	36	1	61.4	44.6
93	67.8	48.2	37.5	0.85	1.28533	42.3	1.75	39.1	17.3	8.74	91.3	3.24	37.7	19	7.91	35.4	26.4	48.7	39.3	79.3	70.7	25.1	25.1	17	4.15	4.15	28.2	5.61	53.2	4.1	3.37	1.53	0.24	0.24	0.24	0.24	9.86	74.1	1.2	69.5	11.1
94	80.3	44.4	30.7	0.56	1.44625	48.3	3.12	50	20.8	6.8	93.2	3.8	28.9	14.2	5.5	41.4	30.5	78.3	9.66	80.1	19.9	26.1	26.1	9.2	1.89	1.89	26.6	5.35	57.4	1.36	1.76	1.73	0.21	0.21	0.21	0.21	11.7	71.7	2.9	44.6	19.7
95	78	48.5	41.9	0.72	1.15752	42.2	5.14	24.2	32.4	27.5	72.5	4.53	19.8	42	2.03	16.2	68.1	71.3	16.7	67.2	32.8	19	19	11.3	1.89	1.89	30.2	4.53	22.7	1.36	0.36	1.42	0.17	0.17	0.17	0.17	21.6	30.9	1.63	33.6	50.7
96	81.6	41.7	53.7	0.94	0.776536	44.4	8.07	32.5	30.1	12.4	87.6	2.31	14.45	45.9	2.26	27.4	61.4	58.8	29.2	81.6	88.4	13.5	13.5	14	2.14	2.14	32	8	37.6	1.84	3.68	1.72	0.15	0.15	0.15	0.15	23.1	39.1	0.71	21.3	52.8
97	60.2	52.9	39.2	1.22	1.34949	27.1	6.84	33.2	39.6	6.97	93	4.71	37.5	39.5	5.33	17.7	40	37.3	50.7	65.7	84.3	18.2	18.2	14.2	1.51	1.51	33.8	9.8	45.2	1.7	1.41	1.05	0.11	0.11	0.11	0.11	24	63	0.85	54.1	25.4
98	86.7	64.7	52	1.33	1.24423	34.4	3.48	40.8	19.1	11.1	88.9	2.98	11.22	20.4	2.95	65.4	66	69.4	18.6	43.1	56.9	19.9	19.9	14.3	1.25	1.25	31.1	4.81	31.6	4.03	7.91	2.34	0.3	0.3	0.3	0.3	6.39	35.9	0.44	47.8	58.2
99	80.6	50.2	30.2	0.92	1.66225	48	2.48	34.4	21.9	5.06	94.9	3.67	18.2	20.3	3.95	57.5	46.9	28.8	59.2	30.3	69.7	14.7	14.7	17.4	3.26	3.26	34.3	6.51	43.7	4.94	3.82	0.98	0.19	0.19	0.19	0.19	13.6	50.3	1.52	27.1	39.7
100	69.3	63	36.4	1.33	1.73077	43.1	3.02	45.2	22.9	4.11	95.9	4.5	28.2	23.3	8.48	40.1	39.3	81.9	6.13	81.1	18.9	27.2	27.2	16.2	2.3	2.3	29.9	6.77	46.9	5.41	2.82	1.84	0.14	0.14	0.14	0.14	29.4	64.4	1.38	40.2	11.9
																												7.96
																												8.21
																												6.86
																												9.3
																												5.39

## Sheet: before and after treatment
number	status	SLEDAI	LN	24-h UPRO	C3	ANA	anti ds-DNA	T cell	CD4+T cell	CD8+T cell	Double-positive T cell	Th/Tc	Naive CD4+T cell	Terminally differentiated CD4+T cell	Central memory CD4+T cell	Effector memory CD4+T cell	CD28-CD4+T cell	CD28+CD4+T cell	Regulatory T cell	Naive CD8+T cell	Terminally differentiated CD8+T cell	Central memory CD8+T cell	Effector memory CD8+T cell	CD28-CD8+T cell	CD127+ effector memory CD8+T cell	CD127- effector memory CD8+T cell	CD127+ terminally differentiated CD8+T cell	CD127-terminally differentiated CD8+T cell	Tfh	Th1	Th2	Th17	Tfh1	Tfh2	Tfh17	Tc1	Tc2	Tc17	Th1/Th2	Th17/Th2	(Th1+Th17)/Th2	CXCR5-PD1+CD4+T cell	CXCR5+PD1+CD4+T cell	PD1+CD8+T cell	CD28+CD8+T cell	HLADR+CD8+T cell	HLADR＋CD38+CD8+T cell	CD28-CD57+CD8+T cell
1	before	14	1	3355	0.553	435.3	315.4	74.51	49.1	47.1	0.18	1.04246	29.7	7.37	43.5	27.9	5.45	94.6	8.62	11.54	83.6	4.01	14.69	36.2	48.5	44.5	64	55.5	17.7	9.42	21.7	4.41	2.31	26.3	19.6	30.5	29	0.88	0.43	0.2	0.64	86.3	14	4.72	50.3	2.06	69.3	2.5
2	before	10	0	116	0.438	477.1	344.9	86.7	45.3	47.2	0.52	0.959746	33.8	4.05	40	37.9	2.66	97.3	8.09	14.7	64.4	4.41	30.3	19.5	25.4	87.1	8.81	91.2	20.1	20.6	21.9	2.65	2.86	9.46	13.4	44.8	18.9	0.26	1.89	0.24	2.13	87	15.2	7.14	84	8.2	82.8	6.04
3	before	10	1	419	0.355	466	451.7	75	44	49.4	0.41	0.890688	14	7.49	68.2	33.6	8.09	91.9	2.48	48.8	40.1	4.01	20.9	49	51.6	60.9	14.3	85.7	21.6	37.5	16.8	4.47	3.03	21.8	7.28	56.5	24.7	0.86	2.23	0.27	2.5	82.1	18.2	23.6	63.3	1.17	82.1	19.7
4	before	10	1	2003	0.41	417.3	333.1	75.8	65.2	27.8	1.11	2.34532	46.4	4.39	20.8	48.3	0.79	99.2	2.53	35.4	16.7	9.79	51.9	40.1	84.2	28.3	29.6	70.4	16.6	23.6	7.78	1.39	1.59	20.5	17.3	57.3	38.5	3.66	4.08	0.24	4.32	93.5	15	21.1	59.9	4.18	25.3	30.6
5	before	8	1	871	0.158	411	321.4	87.1	60.9	52.3	0.87	1.16444	25.6	4.92	56.1	31.1	8.2	91.8	5.34	28.4	41.6	3.53	40.3	47.9	23.5	89	8.31	91.7	20.3	16.7	19.3	2.73	2.29	21.1	7.19	25.8	28.3	0.39	0.87	0.14	1.01	74.7	17.6	25.3	52.1	23.1	91.9	25.6
6	before	8	1	618	0.503	451.3	298.9	66.2	60.3	33	1.77	1.82727	23.2	5.64	62.9	34.4	21.6	78.4	2.2	25	30.5	6.21	52.1	50.4	36.5	76	12.4	87.6	34	5.21	7.99	5.5	1.5	21.9	15.7	13.3	30	3.36	0.65	1.94	2.59	79.8	10.6	18	49.1	10.6	75.5	20.8
7	before	10	0	111	0.79	108.2	59.8	83.9	59.9	40.5	2.18	1.47901	25.6	6.46	54	48.6	25.9	74.1	1.84	27.3	40.5	4.95	41	38.3	61.6	50.9	6.78	93.2	33.3	48.1	8.91	2.93	0.9	16.9	9.22	56.7	40.9	3.12	5.4	0.33	5.73	68.6	10.6	7.98	60.6	7.81	8.71	20.2
8	before	6	0	68	0.595	123.7	71.5	75.8	65.2	25.9	0.37	2.51737	35.1	5.16	37.8	39.7	2.93	97.1	3.96	20.1	45.5	8.6	39.5	35.8	53.2	59.3	27.2	72.8	26.6	26.7	11.1	1.99	0.48	22.3	10.9	66.2	45.5	0.85	2.64	0.2	2.84	70.5	14.7	19.1	55.5	12.9	33.3	21.7
9	before	18	1	1058	0.38	530	762.9	87.9	75.3	21	0.54	3.58571	38.2	4.91	33.4	41.1	3.9	96.1	14.5	15.2	62.8	5.57	30.3	40.3	94.8	17.7	84.1	15.9	30.5	10.9	11.1	1.63	0.68	25	10.1	54.1	39.3	0.22	0.98	0.15	1.13	70.3	18.4	9.68	60	22.4	84.1	15.9
10	before	11	0	82	0.506	374.2	145.8	56.6	46.6	48.9	0.53	0.952965	39.4	6.69	63.1	31.6	2.13	97.9	8	21.3	56.5	4.04	31.9	33.7	85.4	27.1	70.9	29.1	12.7	17.8	11	6.97	3.18	13.8	15.4	65.2	21.6	1.07	1.62	0.29	1.91	80.4	11	5.88	64.9	2.73	93.7	10.3
11	before	11	1	638	0.193	517.2	611.1	75.3	71.1	26.7	0.4	2.66292	56.6	8	42.6	23.06	3.07	96.9	2.48	29.3	59.8	4.07	20.7	33.5	75.4	37.1	75.4	24.6	25.5	11.3	33.37	2.75	1.57	10.4	14.9	68.5	32.7	0.034	3.35	0.82	4.17	69.4	12.8	12.7	64.7	2.72	81.9	19.9
12	before	10	0	58	0.43	392.4	110.2	63.5	45	51.7	0.54	0.870406	57.1	3.98	51.1	45.4	1.51	98.5	1.71	12.5	56.5	9.45	35.4	34.9	97.8	9.31	90.7	9.25	14.4	9.75	15	1	0.57	28.9	6.18	56.4	34.8	0.32	0.65	0.067	0.72	85.6	12.3	14.7	65	1.84	70	24.5
13	before	18	1	1415	0.285	332.1	451.2	73.9	29.8	53.6	0.51	0.55597	38.3	8.3	71.1	21.56	26.1	55.9	3.95	12.9	12.5	4.17		13.6	40.6	28	28	72	46.85	18.5	5.82	6.4	3.68	25.7	6.18	13.9	18	1.3	3.18	1.1	4.28	70.3	6.36	13.3	86.4	3.73	31.4	7.9
1	after	4	1	76	0.86	360.1	220	62.3	59	31.7	0.53	1.8612	24.2	10.1	41.3	30.7	2.27	98.7	11.9	22.5	45	4.33	18	39.1	23.3	51.7	26.7	73.3	20.4	15.3	15	2.31	14.8	36.7	12.8	29	1.73	0.8	0.61	0.092	0.7	59.8	16.9	6.52	55.5	3.4	17.8	11.5
2	after	4	0	95	1.05	314	210	78.5	44.9	49.5	1.45	0.907071	39.3	2.51	13.8	46.4	1.04	99	7.22	34.6	69.2	4.68	11.44	24.4	17.5	87.52	91	88.97	20	6.91	10.6	2.86	8.14	21.1	11.3	18.9	1.96	0.24	0.34	0.14	0.47	78.3	17.9	2.58	75.4	1.31	34.4	16.6
3	after	5	1	370	0.384	330.2	342	75.6	25.3	58.5	0.5	0.432479	11.3	9	62.6	38.47	19.5	93.5	3.82	14	14.6	3.2	23.2	53	25.5	74.5	8.53	91.5	14.2	24.7	9.5	3.03	20.6	35.4	3.11	24.7	1.67	1.13	1.27	0.16	1.42	61	13.5	36.7	37	6.05	44.8	46.3
4	after	6	1	1635	0.73	394.5	243	81.1	62	32.5	1.09	1.90769	51.5	2.68	18.7	25	1.17	95.8	3.71	27	17	5.27	43.4	36.7	62.2	32.77	87.1	12.9	16.8	17.9	3.2	1.59	12.3	36.9	16.5	38.5	4.27	1.18	1.75	0.16	1.91	61.7	15.3	24.1	63.3	1.18	26.9	23.3
5	after	1	1	104	0.507	354.1	113	66.9	39.9	33.7	0.44	1.18398	6.66	1.01	66.2	26.2	2.43	97.6	8.39	18.25	36.5	2.54	54.4	28.6	67	98.35	88.7	11.3	15.3	11.4	5.3	2.29	13.9	29.9	5.25	28.3	4.65	0.24	0.32	0.065	0.39	66.7	27.7	11.7	71.4	1.25	73.7	22
6	after	2	1	63	0.723	362.5	132	64.5	57.5	35.4	2.58	1.62429	15.1	5.58	54.4	36.5	17	83	3.68	8.45	16.9	4.4	34.4	57	30.6	72.61	95.9	84.12	11.9	25.6	7.81	1.5	21.4	31.7	7.06	30	1.75	1.73	3.28	1.47	4.75	68.7	10	32.1	43	9.5	39.9	43.9
7	after	0	0	56	0.79	93.5	26	69.2	50.5	37	2.66	1.36486	8.65	6.07	42.3	26	20.5	80.5	3.86	13.95	27.9	4.55	39.2	32.2	54.2	61.7	93.2	86.8	14.6	23.8	8.48	0.9	26.6	18.5	4.67	40.9	2.74	2.25	2.81	0.11	2.91	57.6	12.2	10.4	67.8	2.15	43.1	24.2
8	after	0	0	62	0.699	100	64	67.8	48.6	42.1	0.41	1.15439	36.5	0.95	38.6	24	1.28	98.7	3.32	22.5	45	5.91	33.6	40.5	55	54	81.5	88.5	17.1	19.2	5.6	0.48	18.3	36	8.29	45.5	1.52	0.66	1.23	0.16	1.39	74.2	15.1	23.4	59.5	3.51	39.3	25.7
9	after	4	1	67	0.93	382.3	278	80.9	54.7	42.5	0.37	1.28706	42.2	1.72	31.2	40	6.09	97.9	15	27.1	37.1	3.74	27.3	43.9	28.6	86.4	8.81	91.2	19.8	8.93	17	0.68	12.7	32	2.81	39.3	1.05	0.12	0.53	0.04	0.57	73.9	16.1	7.46	56.1	2.61	33.9	32.5
10	after	2	0	95	0.567	329.7	62	55.5	53	35	1.1	1.51429	16.1	1.34	40	19.4	2.78	97.2	10.9	22.6	22.6	4.93	40.9	33.6	39.8	25.2	59.2	40.8	14.6	11.8	11.5	3.18	11.3	35.7	8.16	21.6	4.28	0.87	0.37	0.22	0.6	64.5	12	13.9	66.4	4.37	70.3	15.1
11	after	4	1	123	0.9	477.8	345	74.3	45.3	52.6	0.48	0.861217	42.9	5.38	30	29.1	2.45	97.5	3.94	17.1	17.1	3.5	17.1	44.8	68	41.5	98.5	21.47	19.9	13.1	6.3	1.57	16.9	32.6	4.06	32.7	3.87	0.01	0.8	0.096	0.9	65.4	16.3	15.1	25.2	0.59	29.1	58.5
12	after	0	0		0.734	369.4	53	62.9	26.5	69.9	0.57	0.379113	21.4	1.98	11.2	25.5	2.1	87.9	5.1	12	12	4.13	33.8	39	63.5	1.48	97.4	2.6	11.7	18.5	10.5	0.57	13.8	43.2	1.76	34.8	2.24	0.4	0.9	0.028	0.93	55.6	13.4	21.2	21	1.93	80.3	48
13	after	5	1	149	0.553	112.6	225	50.4	19.7	69.2	0.44	0.284682	11.3	4.63	67.5	23	25.64	94.4	4.3	5.9	1.9	6.35	83.6	13	35.9	42.3	9.11	57.7	13.9	52.8	3.48	3.68	10.2	18.8	1.98	18	14.04	0.7	5.57	0.92	6.49	65.1	14.1	7.48	87	0.77	10.7	3.77
